# Supplementary material for: On-Chip Antifouling Gel-Integrated Microelectrode Arrays for In Situ High-Resolution Quantification of the Nickel Fraction Available for Bio-Uptake in Natural Waters
Source: MDPI journal article supplement (doi:10.3390/molecules28031346), 2023-01-31
Supplement: s1 [file s1]

# Supplementary Materials

## **On-chip antifouling gel-integrated microelectrode arrays for in situ high-resolution quantification of Nickel fraction available for bio-uptake in natural waters**

Sébastien Creffield<sup>1</sup>, Mary-Lou Tercier-Waeber<sup>1\*</sup>, Tanguy Gressard<sup>1</sup>, Eric Bakker<sup>1</sup>, Nicolas Layglon<sup>1\*</sup>

<sup>1</sup>University of Geneva, Sciences II, 30 Quai E.-Ansermet, 1221 Geneva 4, Switzerland

\* Corresponding authors: marie-louise.tercier@unige.ch  
nicolas.layglon@unige.ch

## S.1. Field test area

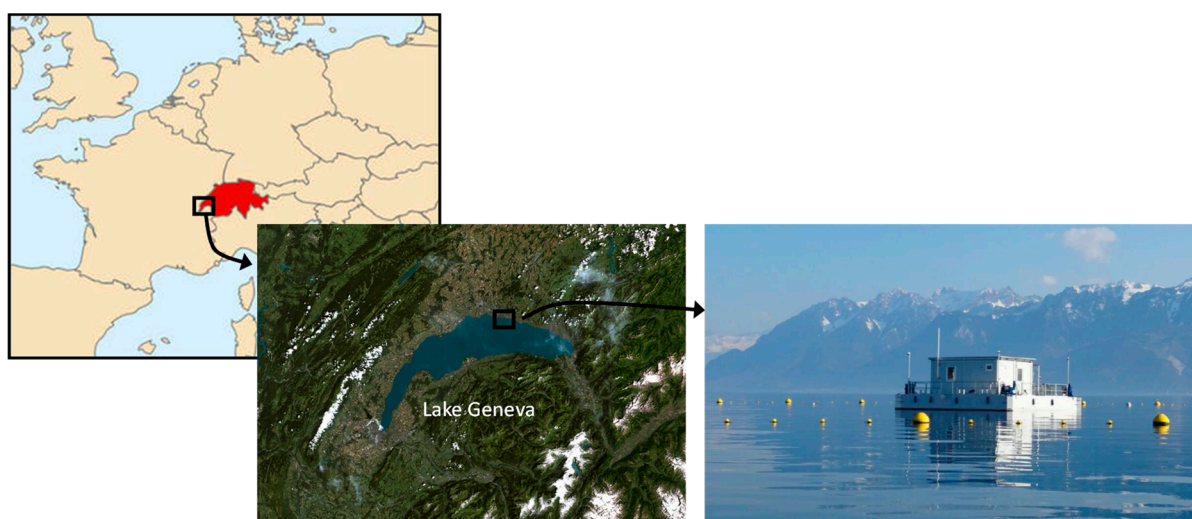

Figure S1: Map of the Lake Geneva associated to a picture of the LeXPLORE platform.

## S.2. Ad-SWCSV measurements of the dynamic Ni-nioxime fraction

Table S1 : Summary of the Ad-SWCSV protocol for the determination of the dynamic Ni- and Co-nioxime fractions

| External cell Ni and Co Ad-SWCSV protocol                                                                                                                                                                                                                                                                                                                                                                                                                                                                                                                                                                                                                                                                                                                                                                                                                                                                                                                                                                                                                                                                                                                                                                                                                                     | Flow-through cell Ni and Co Ad-SWCSV protocol                                                                                                                                                                                                                                                                                                                                                                                                                                                                                                                                                                                                                                                                                                                                                                                                                                                                                                                                                                                                                                                                                                                                                                                                                                                                            |
|-------------------------------------------------------------------------------------------------------------------------------------------------------------------------------------------------------------------------------------------------------------------------------------------------------------------------------------------------------------------------------------------------------------------------------------------------------------------------------------------------------------------------------------------------------------------------------------------------------------------------------------------------------------------------------------------------------------------------------------------------------------------------------------------------------------------------------------------------------------------------------------------------------------------------------------------------------------------------------------------------------------------------------------------------------------------------------------------------------------------------------------------------------------------------------------------------------------------------------------------------------------------------------|--------------------------------------------------------------------------------------------------------------------------------------------------------------------------------------------------------------------------------------------------------------------------------------------------------------------------------------------------------------------------------------------------------------------------------------------------------------------------------------------------------------------------------------------------------------------------------------------------------------------------------------------------------------------------------------------------------------------------------------------------------------------------------------------------------------------------------------------------------------------------------------------------------------------------------------------------------------------------------------------------------------------------------------------------------------------------------------------------------------------------------------------------------------------------------------------------------------------------------------------------------------------------------------------------------------------------|
| <p>Gel equilibration: 300 s</p> <p>SW stripping and background parameters:</p> <ul style="list-style-type: none"> <li>- E initial: -700 mV</li> <li>- E final: -1300 mV</li> <li>- Pulse amplitude: 25 mV</li> <li>- Step amplitude: 4 mV</li> <li>- Frequency: 200 Hz</li> </ul> <p>CELL: On</p> <p>Cleaning: E = -1200 mV; t = 30s</p> <p>Preconc.: E = -700 mV; t = 90s</p> <p>Equilibration: E = -700 mV; t = 10s</p> <p>Stripping measurement</p> <p>Cleaning: E = -1200 mV; t = 30s</p> <p>Equilibration: E = -700 mV; t = 10s</p> <p>Background measurement</p> <p>CELL: OFF</p> <p>Data storage (internal memory) and transfer (computer)</p> <p>SW stripping and background parameters:</p> <ul style="list-style-type: none"> <li>- E initial: -1200 mV</li> <li>- E final: -200 mV</li> <li>- Pulse amplitude: 25 mV</li> <li>- Step amplitude: 8 mV</li> <li>- Frequency: 200 Hz</li> </ul> <p>CELL: On</p> <p>Cleaning: E = -100 mV; t = 60s</p> <p>Preconc.: E = -1200 mV; t = 120s</p> <p>Equilibration: E = -1200 mV; t = 60s</p> <p>Stripping measurement</p> <p>Cleaning: E = -100 mV; t = 60s</p> <p>Equilibration: E = -1200 mV; t = 60s</p> <p>Background measurement</p> <p>CELL: OFF</p> <p>Data storage (internal memory) and transfer (computer)</p> | <p>Pump on: 180 s</p> <p>Gel equilibration: 300 s</p> <p>Pump on: 30s</p> <p>SW stripping and background parameters:</p> <ul style="list-style-type: none"> <li>- E initial: -700 mV</li> <li>- E final: -1300 mV</li> <li>- Pulse amplitude: 25 mV</li> <li>- Step amplitude: 4 mV</li> <li>- Frequency: 200 Hz</li> </ul> <p>CELL: On</p> <p>Cleaning: E = -1200 mV; t = 30 s</p> <p>Preconc.: E = -700 mV; t = 90s</p> <p>Equilibration: E = -700 mV; t = 10s</p> <p>Stripping measurement</p> <p>Cleaning: E = -1150 mV; t = 30s</p> <p>Equilibration: E = -700 mV; t = 10s</p> <p>Background measurement</p> <p>CELL: OFF</p> <p>Data storage (internal memory) and transfer (computer)</p> <p>SW stripping and background parameters:</p> <ul style="list-style-type: none"> <li>- E initial: -1200 mV</li> <li>- E final: -200 mV</li> <li>- Pulse amplitude: 25 mV</li> <li>- Step amplitude: 8 mV</li> <li>- Frequency: 200 Hz</li> </ul> <p>CELL: On</p> <p>Cleaning: E = -100 mV; t = 60s</p> <p>Preconc.: E = -1200 mV; t = 120s</p> <p>Equilibration: E = -1200 mV; t = 60s</p> <p>Stripping measurement</p> <p>Cleaning: E = -100 mV; t = 60s</p> <p>Equilibration: E = -1200 mV; t = 60s</p> <p>Background measurement</p> <p>CELL: OFF</p> <p>Data storage (internal memory) and transfer (computer)</p> |
